# Supplementary material for: Effect of the Deletion of Genes Related to Amino Acid Metabolism on the Production of Higher Alcohols by Saccharomyces cerevisiae
Source: Hindawi journal article supplement (doi:10.1155/2020/6802512), 2020-01-01
Supplement: f1 [file 6802512.f1.pdf]

**Supplementary table S1** Primers used in the present study

| Name                                                             | 5'-3' DNA sequence                             |
|------------------------------------------------------------------|------------------------------------------------|
| <b>Oligos used for construction of gene disruption cassettes</b> |                                                |
| GAP1-FA-U                                                        | TAACGATAACCGATGGACC                            |
| GAP1-FA-D                                                        | CCTGCAGCGTACGAAGCTTCAGCTGGACACCGTAATACTGATGGA  |
| GAP1-FB-U                                                        | TATCAGATCCACTAGTGGCCTATGCAGCAACCGAGACCTGAAC    |
| GAP1-FB-D                                                        | CACCCAACTGAAACTTATCC                           |
| GAP1-K-U                                                         | ACAGCACTATGAGTCGCACCAGCTGAAGCTTCGTACGCTGCAGG   |
| GAP1-K-D                                                         | GTTTCAGGTCTCGGTTGCTGCATAGGCCACTAGTGGATCTGATA   |
| AGP1-FA-U                                                        | TCATCCAAACCGACACCT                             |
| AGP1-FA-D                                                        | CCTGCAGCGTACGAAGCTTCAGCTGACCTCCAAGCCAAAGAAA    |
| AGP1-FB-U                                                        | TATCAGATCCACTAGTGGCCTATGCGCATCTTAGCCGTCTTATC   |
| AGP1-FB-D                                                        | GAATCGTCGTTACTGTGGT                            |
| AGP1-K-U                                                         | TTTCTTTGGCTTGGAGGTCAGCTGAAGCTTCGTACGCTGCAGG    |
| AGP1-K-D                                                         | GATAAGACGGCTAAGATGCGCATAGGCCACTAGTGGATCTGATA   |
| BAP2-FA-U                                                        | AGGTAGTTGGAGCGACAG                             |
| BAP2-FA-D                                                        | CCTGCAGCGTACGAAGCTTCAGCTGTGGACACTTCCCATTAGAG   |
| BAP2-FB-U                                                        | TATCAGATCCACTAGTGGCCTATGCATTAGTAGGTGCAAGGTGG   |
| BAP2-FB-D                                                        | CAAAGGTGTATGTACGGTTT                           |
| BAP2-K-U                                                         | CTCTAATGGGAAGTGTCCACAGCTGAAGCTTCGTACGCTGCAGG   |
| BAP2-K-D                                                         | CCACCTTGCACCTACTAATGCATAGGCCACTAGTGGATCTGATA   |
| GDH1-FA-U                                                        | GTGTTTGTGGGCAGATTAT                            |
| GDH1-FA-D                                                        | CCTGCAGCGTACGAAGCTTCAGCTGCACCAGGCTTATTGATGAC   |
| GDH1-FB-U                                                        | TATCAGATCCACTAGTGGCCTATGCGGTAAACGCATTTGTAACCTC |
| GDH1-FB-D                                                        | ATGACCAGAAAGCCCACT                             |
| GDH1-K-U                                                         | GTCATCAATAAGCCTGGTGCAGCTGAAGCTTCGTACGCTGCAGG   |
| GDH1-K-D                                                         | GAGTTACAAATGCGTTTACCGCATAGGCCACTAGTGGATCTGATA  |
| ADO80-FA-U                                                       | GAGCAGCACAACCTACCCT                            |
| ADO80-FA-D                                                       | CCTGCAGCGTACGAAGCTTCAGCTGTCCCACGACTAACTTGATA   |
| ADO80-FB-U                                                       | TATCAGATCCACTAGTGGCCTATGCACCAAGACAACCGCACTA    |
| ADO80-FB-D                                                       | GACAAAGAAAGCCCAGAA                             |
| ADO80-K-U                                                        | TATCAAGTTAGTCGTGGGACAGCTGAAGCTTCGTACGCTGCAGG   |
| ADO80-K-D                                                        | TAGTGCGGTTGTCTTGGTGCATAGGCCACTAGTGGATCTGATA    |
| CAN1-FA-U                                                        | GGCACCAAGAATAGAGTTT                            |
| CAN1-FA-D                                                        | CCTGCAGCGTACGAAGCTTCAGCTGAGCAGACGGAGTAGAAGC    |
| CAN1-FB-U                                                        | TATCAGATCCACTAGTGGCCTATGCATCACTTGTTCCTGTATC    |
| CAN1-FB-D                                                        | GTCACTGTATCTGCTGCTT                            |
| CAN1-K-U                                                         | GCTTCTACTCCGTCTGCTCAGCTGAAGCTTCGTACGCTGCAGG    |
| CAN1-K-D                                                         | GATACAGGCAACAAGTGATGCATAGGCCACTAGTGGATCTGATA   |
| BAT2-FA-U                                                        | CTCATCTACTTCAAGAGACTGAG                        |

BAT2-FA-D CCTGCAGCGTACGAAGCTTCAGCTGATCGTTCTTAAAACTCGTGGAG  
 BAT2-FB-U TATCAGATCCACTAGTGGCCTATGCAGTATCGCTATTGCTACGTAAAG  
 BAT2-FB-D GCCTAAAGCCATCTGATAGGTAC  
 BAT2-K-U CTCCACGAGTTTTAAGAACGATCAGCTGAAGCTTCGTACGCTGCAGG  
 BAT2-K-D CTTTACGTAGCAATAGCGATACTGCATAGGCCACTAGTGGATCTGATA  
 GAD1-FA-U CACCTATTTCCCGTGCTT  
 GAD1-FA-D CCTGCAGCGTACGAAGCTTCAGCTGAATGTCAGACCCTACTATCAAC  
 GAD1-FB-U TATCAGATCCACTAGTGGCCTATGCGCCTGGACAGTGATAGAAA  
 GAD1-FB-D CAACGGGATAGGAATAAAA  
 GAD1-K-U GTTGATAGTAGGGTCTGACATTCAGCTGAAGCTTCGTACGCTGCAGG  
 GAD1-K-D TTTCTATCACTGTCCAGGCGCATAGGCCACTAGTGGATCTGATA

**Oligos used for diagnostic purposes**

GAT1-1-U TTGACATTCTTCTGGCTTCC  
 GAT1-1-D CCTCAGTGGCAAATCCTAA  
 GAP1-2-U AATAACGGTTTGGTTGA  
 GAP1-2-D TTGGCTGAATACTACTCCTT  
 AGP1-1-U CTAACGAGCGAGCACA  
 AGP1-1-D CAGTATAGCGACCAGCA  
 AGP1-2-U GCAGACCGATAACCAGG  
 AGP1-2-D TTACACCGCAAGACCA  
 BAP2-1-U ACATTTCTTACGGATTGG  
 BAP2-1-D CAGTATAGCGACCAGCA  
 BAP2-2-U TGCCCAGATGCGAAGT  
 BAP2-2-D TGGTCCATTTGCCAC  
 GDH1-1-U AACGGTATCGACCCTAT  
 GDH1-1-D AACCTCAGTGGCAAATC  
 GDH1-2-U CAGACTAAACTGGCTGACG  
 GDH1-2-D GCCTCCTTCGCAAAT  
 ADO80-1-U CATTATCTTCGGCTCAA  
 ADO80-1-D CAAGACTGTCAAGGAGGG  
 ADO80-2-U GCAGACCGATAACCAGG  
 ADO80-2-D CCCGTAACAAGGGAAA  
 CAN1-1-U TGCCTTTGATAGTGCC  
 CAN1-1-D CTAATACCTGGAATGCTG  
 CAN1-2-U GGTATAAATGGGCTCG  
 CAN1-2-D GTCGGTGGTCTCAACA  
 BAT2-1-U TGTCGCCGCCGTCAATAA  
 BAT2-1-D CTGAGCGAGACGAAATAC  
 BAT2-2-U ATGCGTCAATCGTATGTG  
 BAT2-2-D TTTCTCTATGTCCCTCC

GAD1-1-U AAGAGGAACCACCTACCC  
GAD1-1-D CCTGAGCGAGACGAAAT  
GAD1-2-U ATCGCGTATTTTCGTCTC  
GAD1-2-D CCAGCACCATTTAGTCAT

**Oligos used for real time qPCR**

FBC6-U ACAAAGCAGGCTCACAAG  
FBC6-D AAGGAGTATCCGCAGGTC  
GAT1-U AGCACGAACAGAGTCCCG  
GAT1-D GGTTATGCAAACGCCAAG  
AGP1-U AATTGATCGGAATTGTATGG  
AGP1-D CAACATTAGTGACTGCTGCTT  
BAP2-U GAGGAGTATGCGTTGAAAT  
BAP2-D AGGTATTGGGACTGGTCTT  
GDH1-U AGACAAGTTCACGGAAGGA  
GDH1-D ACACCCAGAATACAGAAAGG  
ADO80-U TGACCACGACAACGAGAA  
ADO80-D CTTTGGGCGAATGAGAAT  
CAN1-U GCGGTTGGTCAGAGGTGT  
CAN1-D TGGAGGATGGCATAGGTG  
BAT2-U GCTGCGATTGTTTCTCCC  
BAT2-D TTGCCATGCTCAGTCTCG  
GAD1-U GTACCGCTGGTAGCCTTCA  
GAD1-D ATCCATCCGTTGCCTTTG

---
